# Supplementary material
Source: publisher figshare collection journal article supplement (https://rs.figshare.com/ndownloader/files/21268845)
Supplement: Supplementary file [file 21268845]

**Table S1. Genes up or down regulated by Top3 $\beta$  overexpression.**

| Number | Annotation                                 | Orf number | Fold change<br>(pPTop3 $\beta$ /5' $\Delta$ 5N-Pac)* |
|--------|--------------------------------------------|------------|------------------------------------------------------|
| 1      | VSP                                        | 113304     | 64.34                                                |
| 2      | VSP                                        | 113163     | 39.80                                                |
| 3      | Hypothetical protein                       | 31366      | 14.44                                                |
| 4      | Cyst wall protein 1                        | 5638       | 11.94                                                |
| 5      | Hypothetical protein                       | 5206       | 9.48                                                 |
| 6      | Cyst wall protein 2                        | 5435       | 9.11                                                 |
| 7      | Hypothetical protein                       | 16622      | 8.65                                                 |
| 8      | Ceramide<br>glucosyltransferase            | 11642      | 8.40                                                 |
| 9      | VSP                                        | 41472      | 8.33                                                 |
| 10     | Glucose 6-phosphate<br>N-acetyltransferase | 14259      | 7.98                                                 |
| 11     | VSP with INR                               | 113450     | 7.86                                                 |
| 12     | High cysteine membrane<br>protein Group 6  | 113512     | 7.50                                                 |
| 13     | VSP with INR                               | 16501      | 7.50                                                 |
| 14     | VSP                                        | 114162     | 6.90                                                 |
| 15     | Hypothetical protein                       | 27652      | 6.34                                                 |
| 16     | Hypothetical protein                       | 14690      | 6.19                                                 |
| 17     | Hypothetical protein                       | 3731       | 6.19                                                 |
| 18     | Hypothetical protein                       | 4984       | 5.98                                                 |
| 19     | VSP, putative                              | 114286     | 5.44                                                 |
| 20     | Hypothetical protein                       | 11120      | 5.35                                                 |
| 21     | VSP                                        | 112867     | 5.17                                                 |
| 22     | Hypothetical protein                       | 7374       | 5.08                                                 |
| 23     | Hypothetical protein                       | 135270     | 5.07                                                 |
| 24     | Hypothetical protein                       | 8505       | 4.93                                                 |
| 25     | Hypothetical protein                       | 102575     | 4.45                                                 |
| 26     | VSP                                        | 11521      | 4.39                                                 |
| 27     | Hypothetical protein                       | 9605       | 4.38                                                 |
| 28     | Hypothetical protein                       | 115669     | 4.30                                                 |
| 29     | VSP presumed INR                           | 137714     | 4.29                                                 |
| 30     | VSP with INR                               | 11470      | 4.25                                                 |
| 31     | VSP                                        | 137708     | 3.89                                                 |

|    |                                                  |        |      |
|----|--------------------------------------------------|--------|------|
| 32 | Sugar transport family protein                   | 9046   | 3.89 |
| 33 | Hypothetical protein                             | 32657  | 3.89 |
| 34 | Hypothetical protein                             | 28112  | 3.89 |
| 35 | CEGP1 protein                                    | 17120  | 3.89 |
| 36 | Adenylate cyclase                                | 14367  | 3.58 |
| 37 | Hypothetical protein                             | 119703 | 3.45 |
| 38 | Hypothetical protein                             | 116201 | 3.44 |
| 39 | Hypothetical protein                             | 16078  | 3.37 |
| 40 | Zinc finger domain                               | 2116   | 3.35 |
| 41 | Hypothetical protein                             | 113303 | 3.32 |
| 42 | VSP                                              | 115796 | 3.13 |
| 43 | VSP, putative                                    | 118133 | 3.12 |
| 44 | High cysteine membrane protein Group 1           | 32607  | 3.12 |
| 45 | VSP                                              | 101765 | 3.11 |
| 46 | Hypothetical protein                             | 36883  | 3.03 |
| 47 | Hypothetical protein                             | 13878  | 2.98 |
| 48 | Hypothetical protein                             | 8960   | 2.96 |
| 49 | Hypothetical protein                             | 23934  | 2.96 |
| 50 | Hypothetical protein                             | 119224 | 2.92 |
| 51 | Cathepsin B-like cysteine proteinase 3 precursor | 114165 | 2.92 |
| 52 | High cysteine membrane protein Group 6           | 114470 | 2.84 |
| 53 | Protein 21.1                                     | 4846   | 2.73 |
| 54 | Nicotinamide-nucleotide adenylyltransferase      | 92618  | 2.71 |
| 55 | Hypothetical protein                             | 35638  | 2.67 |
| 56 | Hypothetical protein                             | 101768 | 2.59 |
| 57 | Hypothetical protein                             | 11050  | 2.54 |
| 58 | Hypothetical protein                             | 2860   | 2.53 |
| 59 | VSP                                              | 122566 | 2.51 |
| 60 | Hypothetical protein                             | 2605   | 2.49 |
| 61 | VSP with INR                                     | 113439 | 2.48 |
| 62 | VSP                                              | 112801 | 2.45 |
| 63 | Glucosamine-6-phosphat                           | 8245   | 2.44 |

|    |                                                        |        |      |
|----|--------------------------------------------------------|--------|------|
|    | e deaminase                                            |        |      |
| 64 | Hypothetical protein                                   | 2692   | 2.41 |
| 65 | Retinoic acid induced<br>17-like protein               | 11930  | 2.39 |
| 66 | VSP with INR                                           | 115797 | 2.39 |
| 67 | VSP                                                    | 26894  | 2.37 |
| 68 | Furin precursor putative<br>serine protease            | 2897   | 2.37 |
| 69 | UDP-glucose<br>4-epimerase                             | 7982   | 2.37 |
| 70 | High cysteine membrane<br>protein Group 1              | 11309  | 2.36 |
| 71 | Hypothetical protein                                   | 33672  | 2.33 |
| 72 | Hypothetical protein                                   | 114210 | 2.31 |
| 73 | Hypothetical protein                                   | 29757  | 2.29 |
| 74 | Protein Kinase                                         | 4033   | 2.25 |
| 75 | Protein 21.1                                           | 92983  | 2.21 |
| 76 | Hypothetical protein                                   | 2404   | 2.21 |
| 77 | Hypothetical protein                                   | 8325   | 2.21 |
| 78 | Hypothetical protein                                   | 7598   | 2.17 |
| 79 | Hypothetical protein                                   | 10425  | 2.14 |
| 80 | Fatty acid elongase 1                                  | 92729  | 2.14 |
| 81 | Hypothetical protein                                   | 11148  | 2.14 |
| 82 | Hypothetical protein                                   | 117068 | 2.12 |
| 83 | Hypothetical protein                                   | 14833  | 2.11 |
| 84 | High cysteine protein                                  | 94003  | 2.10 |
| 85 | DNA topoisomerase III                                  | 15190  | 2.10 |
| 86 | Hypothetical protein                                   | 119599 | 2.09 |
| 87 | Variant-specific surface<br>protein                    | 11690  | 2.08 |
| 88 | Hypothetical protein                                   | 10552  | 2.06 |
| 89 | Dolichol-phosphate<br>mannosyltransferase,<br>putative | 3180   | 2.06 |
| 90 | Variant-specific surface<br>protein                    | 9276   | 2.05 |
| 91 | Hypothetical protein                                   | 15532  | 2.04 |

|     |                                               |        |      |
|-----|-----------------------------------------------|--------|------|
| 92  | UDP-N-acetylglucosamin<br>e pyrophosphorylase | 16217  | 2.03 |
| 93  | Chorein                                       | 87358  | 2.01 |
| 94  | DNA topoisomerase III                         | 7615   | 0.02 |
| 95  | VSP                                           | 137617 | 0.20 |
| 96  | VSP                                           | 40571  | 0.24 |
| 97  | VSP with INR                                  | 119707 | 0.24 |
| 98  | VSP                                           | 34357  | 0.24 |
| 99  | VSP                                           | 90215  | 0.24 |
| 100 | VSP with INR                                  | 40592  | 0.32 |
| 101 | VSP                                           | 41539  | 0.34 |
| 102 | VSP                                           | 115047 | 0.35 |
| 103 | Hypothetical protein                          | 92625  | 0.37 |
| 104 | VSP                                           | 114065 | 0.38 |
| 105 | High cysteine membrane<br>protein Group 3     | 112126 | 0.38 |
| 106 | High cysteine protein                         | 87706  | 0.39 |
| 107 | VSP                                           | 111903 | 0.39 |
| 108 | VSP                                           | 113093 | 0.39 |
| 109 | VSP                                           | 99743  | 0.40 |
| 110 | Protein 21.1                                  | 15965  | 0.40 |
| 111 | VSP                                           | 121070 | 0.41 |
| 112 | VSP                                           | 137612 | 0.42 |
| 113 | VSP                                           | 116477 | 0.42 |
| 114 | Cytosine deaminase,<br>putative               | 2486   | 0.43 |
| 115 | DNA-damage inducible<br>protein DDI1-like     | 7718   | 0.43 |
| 116 | VSP                                           | 34196  | 0.43 |
| 117 | VSP                                           | 41401  | 0.44 |
| 118 | Hypothetical protein                          | 19870  | 0.44 |
| 119 | VSP                                           | 112678 | 0.44 |
| 120 | High cysteine membrane<br>protein Group 3     | 114891 | 0.45 |
| 121 | Hypothetical protein                          | 125106 | 0.45 |
| 122 | VSP                                           | 41349  | 0.45 |
| 123 | VSP                                           | 118900 | 0.45 |

|     |                                           |        |      |
|-----|-------------------------------------------|--------|------|
| 124 | VSP                                       | 137611 | 0.46 |
| 125 | Hypothetical protein                      | 123980 | 0.46 |
| 126 | Hypothetical protein                      | 17241  | 0.47 |
| 127 | High cysteine membrane<br>protein Group 1 | 10659  | 0.47 |
| 128 | VSP                                       | 137607 | 0.47 |
| 129 | VSP                                       | 111874 | 0.48 |
| 130 | VSP                                       | 101410 | 0.49 |
| 131 | Kinase, NEK                               | 9870   | 0.49 |
| 132 | Hypothetical protein                      | 31420  | 0.49 |
| 133 | Hypothetical protein                      | 99726  | 0.50 |

\**p* values were determined to be <0.05 for groups in which the average means changed by a factor of  $\geq 2.0$  or  $\leq 0.5$ .

**Table S2. Oligonucleotides used for construction of plasmids and PCR.**

| Name                   | Sequence (5'--->3')             |
|------------------------|---------------------------------|
| top3 $\beta$ F (PCR1F) | CACCATGATCCTTCTCATTGCA          |
| top3 $\beta$ R (PCR1R) | TCTGTGTTTGCGACCCCT              |
| top3 $\beta$ HAF       | CAGACAGTATCTGAGTAC              |
| HAR                    | AGCGTAATCTGGAACATCGTATGGGTA     |
| cwp1F                  | ATGATGCTCGCTCTCCTT              |
| cwp1R                  | TCAAGGCGGGGTGAGGCA              |
| cwp2F                  | ATGATCGCAGCCCTTGTCTA            |
| cwp2R                  | CCTTCTGCGGACAATAGGCTT           |
| cwp3F                  | ATGTTTTCTCTGCTTCTTCT            |
| cwp3R                  | TCTGTAGTAGGGCGGCTGTA            |
| myb2F                  | ATGTTACCGGTACCTTCTCAGC          |
| myb2R                  | GGGTAGCTTCTCACGGGGAAG           |
| ranF                   | ATGTCTGACCCAATCAGC              |
| ranR                   | TCAATCATCGTCGGGAAG              |
| top3 $\beta$ realF     | GGAGGGGGACAGACCAAG              |
| top3 $\beta$ realR     | CGTGAGGGATTAGCCCAGT             |
| cwp1realF              | AACGCTCTCACAGGCTCCAT            |
| cwp1realR              | AGGTGGAGCTCCTTGAGAAATTG         |
| cwp2realF              | TAGGCTGCTTCCCACCTTTTGAG         |
| cwp2realR              | CGGGCCCGCAAGGT                  |
| cwp3realF              | GCAAATTGGATGCCAAACAA            |
| cwp3realR              | GACTCCGATCCAGTCGCAGTA           |
| myb2realF              | TCCCTAATGACGCCAAACG             |
| myb2realR              | AGCACGCAGAGGCCAAGT              |
| ranrealF               | TCGTCCTCGTCGAAACAA              |
| ranrealR               | AACTGTCTGGGTGCGGATCT            |
| 18SrealF               | AAGACCGCCTCTGTCAATCAA           |
| 18SrealR               | GTTTACGGCCGGGAATACG             |
| top3 $\beta$ NF        | GGCCGGCTAGCTCGGTGTGATGTGCCAAAGC |

|                     |                                                                                                                                                                                                                                                                                                                                                                                                                                                                                                                                                                                                                 |
|---------------------|-----------------------------------------------------------------------------------------------------------------------------------------------------------------------------------------------------------------------------------------------------------------------------------------------------------------------------------------------------------------------------------------------------------------------------------------------------------------------------------------------------------------------------------------------------------------------------------------------------------------|
| top3 $\beta$ MR     | GGCCGACGCGTTCGGTGTTCGATGTGCCAAAGC                                                                                                                                                                                                                                                                                                                                                                                                                                                                                                                                                                               |
| top3 $\beta$ 865F   | CGCCCCTTGCCAATGA                                                                                                                                                                                                                                                                                                                                                                                                                                                                                                                                                                                                |
| top3 $\beta$ 926R   | GAGAGACCGAGCACCGTTGA                                                                                                                                                                                                                                                                                                                                                                                                                                                                                                                                                                                            |
| top3 $\beta$ m1F    | CTGGATACATTTCTTTCCCAAGAACTGAGTC                                                                                                                                                                                                                                                                                                                                                                                                                                                                                                                                                                                 |
| top3 $\beta$ m1R    | GACTCAGTTCTTGGGAAAGAAATGTATCCAG                                                                                                                                                                                                                                                                                                                                                                                                                                                                                                                                                                                 |
| top3 $\beta$ m2MR   | GGCCGACGCGTAATAGAGGTAAACTTCGCGT                                                                                                                                                                                                                                                                                                                                                                                                                                                                                                                                                                                 |
| top3 $\beta$ m3MR   | GGCCGACGCGTTGTTGCCAGGAAGTGCTTAG                                                                                                                                                                                                                                                                                                                                                                                                                                                                                                                                                                                 |
| top3 $\beta$ 5HF    | GGCGGAAGCTTTACTAACTATGACTCTAGGGC                                                                                                                                                                                                                                                                                                                                                                                                                                                                                                                                                                                |
| top3 $\beta$ 5NR    | GGCGGCCATGGGAATTATTTTTAGCATCCCAG                                                                                                                                                                                                                                                                                                                                                                                                                                                                                                                                                                                |
| top3 $\beta$ 3XF    | GGCGGCTCGAGTGACCATCAAGTGCTTGCTATTAT                                                                                                                                                                                                                                                                                                                                                                                                                                                                                                                                                                             |
| top3 $\beta$ 3KR    | GGCGGGGTACCCTGGCTATCCTTGTAGCATCC                                                                                                                                                                                                                                                                                                                                                                                                                                                                                                                                                                                |
| top3 $\beta$ -guide | <p>GAGAGCGGGTACCCTAGCTTATTGAAAAAGCGAGAGGCCATTGAGATGACTCGCCT</p> <p><u>GATTGCAATAGCAAACAGTGTCTATAGTCTAATTGTGGACAACAGAGGGCTTATTG</u></p> <p><u>CAACGTTGATGACCAAGTTCAACAAGGGCGTCGCCTCCTATGAGCAGGTCATTCCG</u></p> <p><u>AATTTGACGACCGGTAGCGTCCCCAGAGTAAACCATTTTAAATTGAAATAGGCGG</u></p> <p><u>TTGGAAATAAAAGCGCGCC</u><b>GACCTTCATGTGTACTTCTG</b>TTTTAGAGCTAGAAAT</p> <p>AGCAAGTTAAAAAAGGCTAGTCCGTTATCAACTTGAAAAAGTGGCACCGAGTCGG</p> <p>TGCTTTTTTTGAATTCGAGAGCG, underlined region is U6 promoter, bold region is for annealing, underlined and bold region is upstream 3nt of PAM, other region is scaffold RNA</p> |
| top3 $\beta$ m2R    | AATAGAGGTAAACTTCGCGT                                                                                                                                                                                                                                                                                                                                                                                                                                                                                                                                                                                            |
| top3 $\beta$ m3R    | TGTTGCCAGGAAGTGCTTAG                                                                                                                                                                                                                                                                                                                                                                                                                                                                                                                                                                                            |
| PCR2F               | AAGGACCGCGCGACCTGG                                                                                                                                                                                                                                                                                                                                                                                                                                                                                                                                                                                              |
| PCR2R               | CGTCTCCACATGGTATGACCG                                                                                                                                                                                                                                                                                                                                                                                                                                                                                                                                                                                           |
| top3 $\beta$ 5F     | TTGGGGGATGATGGTATCTTC                                                                                                                                                                                                                                                                                                                                                                                                                                                                                                                                                                                           |
| top3 $\beta$ 5R     | GCATCCCAGCCCTCAGCC                                                                                                                                                                                                                                                                                                                                                                                                                                                                                                                                                                                              |
| 18S5F               | CCAAAAAAGTGTGGTGCAGG                                                                                                                                                                                                                                                                                                                                                                                                                                                                                                                                                                                            |
| 18S5R               | GCCGGGCGCGGGCGCCGCGG                                                                                                                                                                                                                                                                                                                                                                                                                                                                                                                                                                                            |
| cwp15F              | CAACGGCTTACTAAATCATTCTCTTG                                                                                                                                                                                                                                                                                                                                                                                                                                                                                                                                                                                      |
| cwp15R              | TTCTGTGTTTCTTGATCTGAGAGTTGT                                                                                                                                                                                                                                                                                                                                                                                                                                                                                                                                                                                     |
| cwp25F              | CACTTTGATGAGAGCATGGG                                                                                                                                                                                                                                                                                                                                                                                                                                                                                                                                                                                            |
| cwp25R              | TTAGTTCATATCTTAAGTTA                                                                                                                                                                                                                                                                                                                                                                                                                                                                                                                                                                                            |
| cwp35F              | TGGGGGAGATAGGAGAATAC                                                                                                                                                                                                                                                                                                                                                                                                                                                                                                                                                                                            |

|        |                                |
|--------|--------------------------------|
| cwp35R | ATCAGTAGTAACTTATTTTTTGGGAAAGAC |
| myb25F | TGGCTATGTATTTTTTCTTCTTCTACAGCT |
| myb25R | TAGCAGTACAGAGTAATTATTATTTTAGTA |
| U65F   | TTGAGATGACTCGCCTGATTG          |
| U65R   | GAAATTCCGAATGACCTGCTC          |
| iscsF  | CACCATGATTTACCTGGACAAC         |
| iscsR  | GTCATGCTTCCACTCTAT             |
| bipF   | CACCATGACGTCTAGTCACGTTAA       |
| bipR   | GAGTTCATCTTTTTCTGCAT           |



Figure S1

```

G115190 1 -----MILLIAEKPSIAEMTSRNYGEG---A
G17615 1 -----MNRVILCVTEKNSVAAEVSNVLSKGSYSK
HsTOP3b 1 -----MKTVLMVAEKPSLAQSTAKILSRGSLSS
MmTOP3b 1 -----MKTVLMVAEKPSLAQSTAKILSRGNMSS
HsTOP3a 1 MIFPVARYALRWLRPEDRAFSRAAMEMALRGVRKVLCAEKNDAAKGIADLLSNGRMRR
MmTOP3a 1 MIFPVTLALFQWHRPPGGRALSRAAMEVAFRGVRKVLCAEKNDAAKGIADLLSNGRMRR
ScTOP3 1 -----MKVLCVAEKNSTAKAVSQILGGGRSTS
EcTOP1 1 -----MGKALVIVESPAKAKTINKYLGSDYVVK
TmTOP1 1 -----MSKKVKYIVVESPAKAKTIKSYLGNEYEVF
EcTOP3 1 -----MKLFTIAEKPAVANDIVKALGGNFRH

G115190 24 KKLDNVSFPTYTFVQSFE---GSKETFMCTSVAGHVFEIDFDAELN-GSSVPOERLFE
G17615 30 KQLVQYFNEYKFTTHSEEE---HGPAQQYVVVHAQGHMLELE-PDEGYEWGKCSFSDLFT
HsTOP3b 29 HKGLNGACSVHEYTGTFPFA---GQPVRFKMTSVCGHVMTLDELGKYNKWDKVPDAELFS
MmTOP3b 29 HKGLNGACSVHKYTGTFPFA---GQPVRFKMTSVCGHVMTLDELGKYNKWDKVPDAELFS
HsTOP3a 61 REGLSKFNKIYEFDYHLY---GQNVMTVMVMTSVSGHLLAHDFQMQRKWKQSCNPLVLFE
MmTOP3a 61 REGLSKFNKIYEFDYHLY---GQNVMTVMVMTSVSGHLLAHDFQMQRKWKQSCNPLVLFE
ScTOP3 28 RDSGYMYVKNYDFMFSGFPFARNANCEVTMTSVAGHLTGIDFSDHSHGWGKCAIQELFD
EcTOP1 29 SSVGHIRDLPSTSGSAAKK-----SADSTSTKTAKKPKKDERGALVNRMGVDFWHNWE
TmTOP1 32 ASMGHIIDLPKS-----KFGVDLEKDFE
EcTOP3 27 DGWFESDNTIVTNCFGHI-----IESQPPENYNPEYKEWKIETLELRLLYP

G115190 78 RGHVHYSFTDSGSTVAKHLKKSIGGKAMQLLILCLDNDREGENICFEVLKVLKPTLRSDCR-
G17615 85 CGVHFKANAVF---KKHVLRLPNAETNVLLVLMLDADREGENICYDIEIFCSVLPAADTLL
HsTOP3b 84 QAPTEKKEANPKLNMVKFLQVEGRGCDYIVLWLDLDCDKEGENICFEVLDAVLPMNKAHGG
MmTOP3b 84 QAPTEKKEANPKLNMVKFLQVEGRGCDYIVLWLDLDCDKEGENICFEVLDAVLPMNNAHNG
HsTOP3a 116 AEIEKYCPENF-VDIKKTLERETROCCALVIWTDLDCDREGENICFEIILHVCK---AVKPNL
MmTOP3a 116 AEIEKYCPENF-IDIKKTLERETHHCALVIWTDLDCDREGENICFEIILHVCK---AVKPNL
ScTOP3 88 APLNEIMNNQ-KKIASNIKREARNADYLMIIWTDLDCDREGEYIGWEIWEAKRGNRLIQND
EcTOP1 81 AHYEVLPGKEK---VVSELKQLAEKADHIYLATDLDCDREGEIATWHLREVIGDDARYSR-
TmTOP1 55 PEFAVIKGKEK---VVEKLKDLAKKGE-LLIASMDREGEIATWHTARVTN-TLGRKNR-
EcTOP3 72 VKYQPVESA EKQVKTIEELIR-RADVTEIIHAGDPDDEGQLLVDEEVLEYAGNTKPVKRVL

G115190 137 -----VRRARFSAVTKAEIQNAFRNLID
G17615 142 DIRPARLPKIRSPTEHTLRHILAADHVPSQTSVKRTIIVKRARFEGLYPELTSAVYNAG
HsTOP3b 144 EK-----TVFRARFSSITDITDLCNAMACLG
MmTOP3b 144 EK-----TVFRARFSSITDITDLCNAMTRLS
HsTOP3a 172 Q-----VLRARFSEITPHAVRTACENLT
MmTOP3a 172 R-----VLRARFSEITPHAVRTACENLT
ScTOP3 147 Q-----VYRAVFSHLERQHTLNAARNPS
EcTOP1 137 -----VVENEITKNATROAFNKP
TmTOP1 109 -----IVESEITPRVIREAVKNPR
EcTOP3 131 IN-----DNTLPVKKALANPK

G115190 159 KPD--QNLSDAVEARQELDLKIGVAFTRFOTAEHHAQFA-----DLQSS
G17615 202 PID--MNVVDADVVRQFTDLRLGYSITRLQTDKLRSSFIDYRTG-----AFKAKK
HsTOP3b 169 EPD--HNEALSVDARQELDLRIGCAFTRFQTKYFQGYG-----DLQSS
MmTOP3b 169 EPD--HNEALSVDARQELDLRIGCAFTRFQTKYFQGYG-----DLQSS
HsTOP3a 195 EPD--QRVSDADVVRQELDLRIGAAFTRFQTLRLQRIFF-----EVLAEQ
MmTOP3a 195 EPD--QRVSDADVVRQELDLRIGAAFTRFQTLRLQRIFF-----EVLAEQ
ScTOP3 170 RLD--MKSVAHVGTREHDLRAGVFTRLLTETLRNKLNRQATMTKDGAKHRGGNKDSQ
EcTOP1 156 ELN--IDRVNAQQARFMDRVVGYMVSPLLWKKIARGLS-----
TmTOP1 128 EID--MKKVRAQLARRILDRIVGYSLSPVLWRNFKSNLS-----
EcTOP3 148 NNRDFRGILYLKALARSVADAIYGLSMTRAYTIPAKTKGYG-----

G115190 201 VISYGPCTPTLSFCVS-----RHDEIQRFREKQIFSL
G17615 250 PISFGPCQVPTLGLVHSNDLLSLKNHQSSSFTLHLVCDPRPLQTHSGSVFKGLADALKRW
HsTOP3b 211 LISFGPCQVPTLGLFCVE-----RHDKIQSFKPETYVWL
MmTOP3b 211 LISFGPCQVPTLGLFCVE-----RHDKIQSFKPETYVWL
HsTOP3a 238 LISYGSQCFPTLGFVVE-----RFKAIQAFVPEIFHRI
MmTOP3a 238 LISYGSQCFPTLGFVVE-----RFKAIQAFVPEVPHKI
ScTOP3 228 VVSYGTCQFPTLGFVVD-----RFERIRNFVPEEFWYI
EcTOP1 193 ---AGRVQSVAVRLVVE-----REREIKAFVPEEFWEV
TmTOP1 165 ---AGRVQSATLKLVC-----REREILRFVPEKKYHRI
EcTOP3 189 VLSVGRVQTEFVLGLTVN-----RTRANKNHKSSFYYTMT

```

G115190 234 DVICALIG--DQPHSLRWQGVPSSESRVIE-----EKRTGLFGKSATKCLKVLSFKSSKST  
 G17615 310 DSKHRNREKDDLQGLVFSPIDTSHFKSYLGSLPV LKLVFDTLQNKQRIVVSDVEEKPYT  
 HsTOP3b 244 QAKVNTDK-DRSLLLDWDRVRVFDREIAQ-----MFLN---MTKLEKEAQVEATSRKKA  
 MmTOP3b 244 QAKVHTDK-EESLLLDWDRVRVFDWEIAQ-----MFLN---MTKLEKEAQVEATSRKKA  
 HsTOP3a 271 KVTHDHKD--GIVEFNWKRHRLFNHTACL-----VLYQL-CVEDP--MATVVEVRSKPKS  
 MmTOP3a 271 KVTHDHKD--GTVEFNWKRHRLFNHTACL-----VLYQL-CMEDP--MATVVEVRSKPKS  
 ScTOP3 261 QLVVENKDNNGGTTTTFQWDRGHLEDRLSVL-----TFYET-CIETAGNVAQVVDLKSKEPTT  
 EcTOP1 223 DASTTTPSGEALALQVTHQNDKPFPRPVNK-----EQTQAASVSLLEKARYSVLEREDKPTT  
 TmTOP1 195 TVN-----FDGLTAEIDVKEKKFDDAETL-----KEIQSIDELVVEEKVSVKKFAP--  
 EcTOP3 222 TGHFQRGADVIRANWKPGEFAPLTDKRL LDK---TWANGTATSLAGKPAATVVEAAATDDK

G115190 287 LPRPLPMNTVALLKAASTVLGLSPNSAMALAEKLYI-----AGYISYPRTESTTYPES  
 G17615 370 VPRPHPVSTLDMQRAISESLSS--QSVMTIAESLYT-----RGLISYPRTETKSYBN  
 HsTOP3b 295 KQRPLALNTVEMLRVASSSLGMSGPOHAMQTAERLYT-----QGYISYPRTETTHYPE  
 MmTOP3b 295 KQRPLALNTVEMLRVASSSLGMSGPOHAMQTAERLYT-----QGYISYPRTETTHYPE  
 HsTOP3a 321 KWRPQALDTEVELEKLASRKLRINAKETMRIAEKLYT-----QGYISYPRTETNIPFR  
 MmTOP3a 321 KWRPQALDTEVELEKLASRKLRINAKETMRIAEKLYT-----QGYISYPRTETNIPFR  
 ScTOP3 315 KYRPLPLTTVELOKNCARYLRINAKESQLDAEKLYQ-----KGFISYPRTETDTPBH  
 EcTOP1 278 SKPGAPFITSTLQQAASSTRLGFGVKKTMMMAQRLYE-----AGYITVMRTDSTNLSQ  
 TmTOP1 243 ---EPFKTSTLQQAASSTRLGFGVKKTMMMAQRLYE-----AGYITVMRTDSTNLSQ  
 EcTOP3 279 TAAPLPFNLVRLQOQYMNKKFKMTAOKTLDITQOLREK-----YKAITYNRSDCSYLSLSD

G115190 339 GYNLREIVLALKESS-----STRISQCAONLLPSSKKSSDESVRYNPRRGTDQGD  
 G17615 420 TYNLSYFKQLVDKLAHMPPNVSP LCALLADYAQVLLDDSPGNPYTLQLPRSNSASTDNAH  
 HsTOP3b 347 NFDLKGSLRQOAN-----HPYWADTVKRLLAEG-----INRPRKGHDAGD  
 MmTOP3b 347 NFDLKGSLRQOAN-----HPYWADSVKQLLAEG-----INRPRKGHDAGD  
 HsTOP3a 373 DLNLTVLVEQQT-----DPRWGAFQSI LERGGPT-----PRNGNKSQOAH  
 MmTOP3a 373 DLNLTVLVEQQT-----DPHWGAFQSI LERGGPT-----PRNGSKSDOAH  
 ScTOP3 367 AMDLKSLEKQAOLDQLAA--GGRTAWASYAASLLOPENTSNNNKFKFPRSGSHDDKAH  
 EcTOP1 330 DAVNMVRGYISDNFG-----KKYLPESPNOYASKE-----NSQEAHEAIR  
 TmTOP1 299 YAKEEARNLITEVFG-----EYVGSKRERRKSN-----KIQDAHEAIR  
 EcTOP3 332 EQFSEAPQIIDALKS-----VFDQPMIDITTRKS-----KAFNSAKVTAH

G115190 390 HPIIPTG-LIPHVDVSSNELSLYNLT TKHFLATVSPDAVYSHSSLTLOSVDMPSETFLLS  
 G17615 480 LPIHPLACPSR--PLDKDEELVYGYITRSFLASVSPDARGTRMTMRTR---LDKCEFVAT  
 HsTOP3b 387 HPIITPMKSATEAELGGDAWRLYEYITRHFLATVSHDCKYLQSTISFR---IGPELFTCS  
 MmTOP3b 387 HPIITPMKSATEAELGGDAWRLYEYITRHFLATVSHDCKYLQSTISFR---IGPEHFTCM  
 HsTOP3a 415 PPIHPTKYTN--NLQGDQRRLYEYIVRHFLACCSQDAQOQETTVEID---IAQERFVAH  
 MmTOP3a 415 PPIHPTKYTS--GLQGDQRRLYEYIVRHFLACCSQDAQOQETTVEID---IAQERFVAH  
 ScTOP3 424 PPIHPIVSLGPEANVSPVERRVYEVVARHFLACCSEDAKGQSM TLVLD---WAVERESAS  
 EcTOP1 370 PSDVNMAESL-KDMEADAQKLYQLTWRFVACQMTPAKYDSTLTVTG--AGDFRLKARGR  
 TmTOP1 339 PTNVFMTPEEAGKYLSNDQKKLYELTWKRFLASQMKPSQYEETRFVLR--TKDGKYRFKGT  
 EcTOP3 372 TAIIPTVSVDPDVNALSTDERNVYLAIAQHVLVQFMPEKAYQEVSVAIQ---CGDESEFAR

G115190 449 ITDVVDQGWKALYSATEFSSMRDNDLSDDLADESISLSKETLQAISATGATLTIASAAIK  
 G17615 535 QNSLTTFDGFKRILRKSLEEAG-----HLSSSASSPASIESSSSIVVGSKLL  
 HsTOP3b 444 GKTVLSPGETEVMFWQSVF-----LEESLPTCQRGDAFPVGEVKML  
 MmTOP3b 444 GKTVISPGETEIMPWQSVF-----LEESLPTCQKGDTFTVGEVKML  
 HsTOP3a 469 GLMILARNYLDVYPYDHS-----DKLLPVYEQGSHFQFPSTVEMV  
 MmTOP3a 469 GLIILARNYLDVYPYDHS-----DKLLPVYEQGSHFQFPSTVEMV  
 ScTOP3 481 GLVVLERNYLDVYPWARWET-----TKQLPRLEMNALVDIAKAEK  
 EcTOP1 428 ILR--FDGWTQVMPALRKGD-----EDRILPAVNKGDALTLVELTPA  
 TmTOP1 398 VLKKIFDGYEKVWKTERNTG-----EFPFE---EGESVKPVVVKIE  
 EcTOP3 429 ARKTTDSGEAFLGVENAGDDE-----AEVENDSDSFDLCKKIRTGETVTTKEVVVN

G115190 509 AGMTKPPGYLSESDLLGLME-----KHGIGTDASMAATHIG  
 G17615 581 VLQAPYKQFFGTQDLHIINP-----TANDESELLASSIVW  
 HsTOP3b 485 EKQTNPPDYLTAEELITLME-----KHGIGTDASIPVHIN  
 MmTOP3b 485 EKQTSPPDYLTAEELITLME-----KHGIGTDASIPVHIN  
 HsTOP3a 509 DGETSPPKLLTEADLIALME-----KHGIGTDATHAEHIE  
 MmTOP3a 509 DGETSPPQLLTEADLIALME-----KHGIGTDATHAEHIE  
 ScTOP3 522 AGTTAPPKPMTESELILMD-----TNGIGTDATIAEHID  
 EcTOP1 468 QHFTKPPARFSEASLVKELE-----KRGICRFPSTYASTIS  
 TmTOP1 436 EQETKPKPRYTEGSLVKEME-----RLGICRFPSTYASTIK  
 EcTOP3 481 EKKTTTPEPLFTEATLAAALVRVADFVTDPVIKLLKEKDRDKKDEHGGIGTPATRASIL



G115190 544 NIVTRAYVELRVGTGRRRC<sup>L</sup>VP<sup>T</sup>SMGIS<sup>L</sup>IHCYQLIDGDL<sup>S</sup>--SPQLRASIERD<sup>V</sup>TR<sup>L</sup>AE<sup>G</sup>  
 G17615 616 DGDAQSLVIDIDSSDESE<sup>Q</sup>IHAENVHPPPEFVMVNDRED<sup>P</sup>---SNSTSQFSTEL<sup>V</sup>PLPMK  
 HsTOP3b 520 NICOENYVTVESGRR---LKPTNLGIVLVHGYYKIDAEL<sup>V</sup>--LPTIRSAVEKQLNLIAQ<sup>G</sup>  
 MmTOP3b 520 NICOENYVTVESGRR---LKPTNLGIVLVHGYYKIDAEL<sup>V</sup>--LPTIRSAVEKQLNLIAQ<sup>G</sup>  
 HsTOP3a 544 TIKARMYVG---LTPDKRFLPGHLGMLVEGYDSMGYEMS--KPDRLRAELEAD<sup>L</sup>KLICD<sup>G</sup>  
 MmTOP3a 544 TIKARMYVG---LTPDKRFLPGHLGMLVEGYDSMGYEMS--KPDRLRAELEAD<sup>L</sup>KLICD<sup>G</sup>  
 ScTOP3 557 KIQVRNYYRSEKVGKETY<sup>L</sup>QPTLVSLVHGFEATGL<sup>E</sup>DSFAKPFQREMEQDLKKLIC<sup>G</sup>  
 EcTOP1 503 TIQDRGYVR---VENRRFYAEKMG<sup>E</sup>IVTDRLEENFR<sup>E</sup>LMN--YDFTAQMENSLDQVAN<sup>H</sup>  
 TmTOP1 471 LLLNKG<sup>Y</sup>IK---KIRGYLYPTIVG<sup>S</sup>VVMDYLEKKYS<sup>D</sup>VVS--VSFTAE<sup>M</sup>EKDLDEVEQ<sup>G</sup>  
 EcTOP3 541 TLKKR<sup>N</sup>YIT---LEK<sup>G</sup>KLIP<sup>T</sup>DTG<sup>Y</sup>ALIDALPD<sup>L</sup>AVNPD---MTALWAEKQ<sup>T</sup>LIENG

G115190 602 KIRKDVLVNQVLSK<sup>E</sup>LT<sup>K</sup>FLHFKQNI<sup>G</sup>KL<sup>E</sup>-----ALLNAKFTSIKKA<sup>G</sup>R<sup>P</sup>FI<sup>L</sup>C  
 G17615 673 ESALLLAMDQHGIGTDATMSD<sup>H</sup>IALITDR-----EYINSKKQV<sup>V</sup>SLGAEL<sup>L</sup>QFY  
 HsTOP3b 575 KADYRQVLGHTLDV<sup>F</sup>KRK<sup>F</sup>HYFVDSIAGMD-----ELMEVSFSPLAAT<sup>G</sup>KPLSR<sup>C</sup>  
 MmTOP3b 575 KADYRQVLGHTLDV<sup>F</sup>KRK<sup>F</sup>HYFVDSIAGMD-----ELMEVSFSPLAAT<sup>G</sup>KPLSR<sup>C</sup>  
 HsTOP3a 599 KKD<sup>K</sup>FVVL<sup>R</sup>QQV<sup>Q</sup>KY<sup>K</sup>QV<sup>F</sup>IEAVAKAKKLDEALAQYFGNGTELAQ<sup>Q</sup>EDIYPAMPE<sup>R</sup>IRK<sup>C</sup>  
 MmTOP3a 599 KKD<sup>K</sup>FVVL<sup>R</sup>QQV<sup>Q</sup>KY<sup>K</sup>QV<sup>F</sup>IEAVAKAKKLDEALAQYFGNGTEMAQ<sup>Q</sup>EIYPAMPE<sup>R</sup>IRK<sup>C</sup>  
 ScTOP3 617 HAS<sup>K</sup>TDV<sup>V</sup>KD<sup>I</sup>VE<sup>K</sup>Y<sup>R</sup>KY<sup>W</sup>HKT<sup>N</sup>ACKN-----TLLQVYD<sup>R</sup>VKAS<sup>M</sup>-----  
 EcTOP1 557 EA<sup>E</sup>WKAV<sup>L</sup>DH<sup>F</sup>FS<sup>D</sup>ET<sup>Q</sup>QLDKAEKD<sup>P</sup>EEGGM-----RPNQMVLT<sup>S</sup>DCPTC<sup>G</sup>RKM<sup>G</sup>IR  
 TmTOP1 525 KKT<sup>D</sup>KIV<sup>L</sup>REFY<sup>E</sup>SS<sup>S</sup>SV<sup>E</sup>DRNDR-----IVVD<sup>F</sup>PTN-----  
 EcTOP3 592 EMTIEQ<sup>F</sup>VDEL<sup>Y</sup>NDLIP<sup>M</sup>ISNANS-----AEIKVSP<sup>S</sup>SAPS<sup>G</sup>SQ<sup>S</sup>RLS

G115190 652 GECHRYTD<sup>L</sup>IEQYPPRVYCVTDK<sup>L</sup>YTI<sup>P</sup>MRGT<sup>F</sup>IEIPSRKCPYD<sup>G</sup>WFLILHMAEAT<sup>Q</sup>K<sup>R</sup>  
 G17615 722 KQTPMGVQALSCSYRSMLEHGM<sup>L</sup>ICEGQIDCKSVHDDCIRWGMKLYDSIDRLQ<sup>V</sup>IKV<sup>G</sup>-  
 HsTOP3b 625 GKCHRFMKYIQA<sup>K</sup>PSRLHCSHCD<sup>E</sup>TYTLPQNGTIKLYKELRCPLDD<sup>F</sup>ELVLWSSGSRG<sup>K</sup>S  
 MmTOP3b 625 GKCHRFMKYIQA<sup>K</sup>PSRLHCSHCD<sup>E</sup>TYTLPQNGTIKLYKELRCPLDD<sup>F</sup>ELVLWSSGSRG<sup>K</sup>S  
 HsTOP3a 659 PQCKND<sup>M</sup>VLK<sup>T</sup>TKKSGGFY<sup>L</sup>SCMGFP<sup>E</sup>ECRS<sup>A</sup>VWLPDSVLEASRDSSVC<sup>P</sup>QPHPVY<sup>R</sup>LKL  
 MmTOP3a 659 PQCKND<sup>M</sup>VLK<sup>T</sup>TKKSGGFY<sup>L</sup>SCMGFP<sup>E</sup>ECRS<sup>A</sup>VWLPDSVLEASRDSSVC<sup>P</sup>QPPPVY<sup>R</sup>LKL  
 ScTOP3 -----  
 EcTOP1 610 TASTGVFLGCSGYALPPKERCKTTINLVPENEVLNVLEGEDAETNALRAKRRCPKCGTAM  
 TmTOP1 557 -----QKCS-----  
 EcTOP3 634 SPCP-----

G115190 712 TFFCLHCYTFGLNK<sup>E</sup>EALTQ<sup>L</sup>QTVAA<sup>D</sup>GSTDIEQ<sup>T</sup>KAITCGMCLNSL<sup>C</sup>MS<sup>L</sup>LKTQV<sup>G</sup>AC  
 G17615 781 -----GYGGYRMLNEKPK<sup>K</sup>TTIK<sup>R</sup>K  
 HsTOP3b 685 YPLCPYCYNHPPFR-----DMKKGMGCNECTHPS<sup>G</sup>CHSL<sup>S</sup>MLGIG<sup>Q</sup>C  
 MmTOP3b 685 YPLCPYCYNHPPFR-----DMKKGMGCNECTHPT<sup>Q</sup>CHSL<sup>S</sup>MLGIG<sup>Q</sup>C  
 HsTOP3a 719 KFKRGS<sup>L</sup>LPPTMPLEFVCCIGGDDTLREILD<sup>R</sup>FSGGPPRASQPSGR<sup>L</sup>QANQSLNRMDNS  
 MmTOP3a 719 KFKRGS<sup>L</sup>LPPTMPLEFVGCIGGDETLKEIFGLRFP<sup>R</sup>ALPRASQPSGHL<sup>Q</sup>ASQALNRMDSS  
 ScTOP3 -----  
 EcTOP1 670 DSYLIDPKRKLHVC<sup>G</sup>NNPTCDGYEIEEGEFRIKGYD<sup>G</sup>-PIVECEKCGSEM<sup>H</sup>LKMG<sup>R</sup>FC<sup>K</sup>Y  
 TmTOP1 561 -----CGKEMRLSFGKY<sup>G</sup>GFY  
 EcTOP3 638 -----SCGK<sup>Q</sup>IVIRPK-----

G115190 772 WHCNADGRPMLS<sup>V</sup>NRDGPDS<sup>S</sup>PGATNDTLAVARSPEAQEQ<sup>T</sup>PEKSAELASAPVQPKK<sup>I</sup>SI  
 G17615 801 YHSATDGTALVSKRR-----QKEAQFVRVRG<sup>T</sup>F  
 HsTOP3b 727 VECESG-----VLVDLPTSGPKW<sup>K</sup>V  
 MmTOP3b 727 VECENG-----VLVDLPTSGPKW<sup>K</sup>V  
 HsTOP3a 779 QH--PQPADSRQTGSSKALAQTLPPTAAGESNSVTCNCGQEA<sup>V</sup>LLTVRKEGPNRGRQ<sup>F</sup>F  
 MmTOP3a 779 QHNSQPLVNRHTRPSKTVAQALLPPTTAGESNSVTCNCGREAVLLTVR<sup>K</sup>QGPNGRHFY  
 ScTOP3 -----  
 EcTOP1 729 MAC<sup>T</sup>NEECKNTRKILRN<sup>G</sup>EVAP-----PKEDPVPLPELPCEKSDAY<sup>F</sup>  
 TmTOP1 576 LK<sup>C</sup>---ECGKTRSVK-NDEIA-----  
 EcTOP3 649 -----SY

G115190 832 TIKPQAKISLNIPQANKSSGS<sup>A</sup>SAVSPSPNK-----ASSLAELVG<sup>E</sup>YLCLDV<sup>G</sup>TARR<sup>L</sup>P  
 G17615 829 TCCGERCSRNSLAGSCAACGKA<sup>F</sup>QIPRTD<sup>G</sup>-----VIVVLNEECDNCG<sup>L</sup>S  
 HsTOP3b 747 ACNKC<sup>N</sup>VVAHCFENAHRRVRSADTCSVCEA-----ALLDVDFNKA<sup>K</sup>SPLPGDETQ<sup>H</sup>MG  
 MmTOP3b 747 ACNKC<sup>N</sup>VVAHCFENAHRRVRSADTCSVCEA-----ALLDVDFNKA<sup>K</sup>SPLPGNETQ<sup>H</sup>MG  
 HsTOP3a 837 KCNGGSCNFFLWADSPNPGAGGPPALAYRPLGASLGCPGPGIHLG<sup>F</sup>GNP<sup>G</sup>DCSGSG<sup>T</sup>S  
 MmTOP3a 839 KCSNGDCNFFLWADSS<sup>H</sup>STGGTPTASAGPPGSSVGCPSVGD<sup>S</sup>HMD<sup>G</sup>FGSLGSDSDGG<sup>T</sup>P  
 ScTOP3 -----  
 EcTOP1 771 VLRDGAAGVFLAANTFPKSR<sup>E</sup>TRAPLVEELYRFRDRLPEK<sup>L</sup>RYLADAPQ<sup>Q</sup>DPENK<sup>T</sup>MTM<sup>V</sup>R  
 TmTOP1 593 VIDDGK--IFLGR---KDS<sup>E</sup>SGSP-----DGRSVEGK<sup>N</sup>-----  
 EcTOP3 651 SCTGCEFKIWN<sup>E</sup>FSGKKITQAQAEKLIKSG-----KTDLIK<sup>G</sup>FKKKS<sup>G</sup>GTYDA<sup>V</sup>L

|         |     |                                                               |          |     |
|---------|-----|---------------------------------------------------------------|----------|-----|
| G115190 | 885 | GIYCNRCNFQIAFQECKLSLSSDFCACGRIKLRATDLLDKKSASSEVF              | GCVCNDEL | FQT |
| G17615  | 874 | LATITQSRSEIRICVRCRTDPL                                        |          |     |
| HsTOP3b | 800 | CVFCDPVFQELVELKHAASCHPMHRGG                                   |          | P   |
| MmTOP3b | 800 | CIFCDPVFQELVELKHAASCHPMHRGG                                   |          | P   |
| HsTOP3a | 897 | CLCSQPSVTRTVQKDGPNKGRQFHTCAKPREQQCGFFQWVDENTAPGTSGAPSWTGDGRGR |          |     |
| MmTOP3a | 899 | CLCGQPAVTRTVQKDGPNKGRQFHTCAKPREQQCGFFQWVDENVAPGSFAAPAWPGGRGK  |          |     |
| ScTOP3  |     |                                                               |          |     |
| EcTOP1  | 831 | PSRKTQQQYVSSEKDGKATGWSAFYVDGKWVEGKK                           |          |     |
| TmTOP1  | 622 | -----LSEKRRKGKKGS                                             |          |     |
| EcTOP3  | 701 | VLEDKKTGKLGFPARAK                                             |          |     |
| G115190 | 945 | VSEYKDGSGRHPRRAAQPKRHGPRGRKHR                                 |          |     |
| G17615  |     |                                                               |          |     |
| HsTOP3b | 828 | GRRQGRGRGRARRPPGKPNRRPKDKMSALAAFYV                            |          |     |
| MmTOP3b | 828 | GRRQGRGRGRARRPPGKPNRRPKDKMSALAAFYV                            |          |     |
| HsTOP3a | 957 | TLESEARSKRPRASSSDMGSTAKKPRKCSLCHQPGHTRPFCPQNR                 |          |     |
| MmTOP3a | 959 | AQRPEAASKRPRAGSSDAGSTVKKPRKCSLCHQPGHTRPFCPQNR                 |          |     |
| ScTOP3  |     |                                                               |          |     |
| EcTOP1  |     |                                                               |          |     |
| TmTOP1  |     |                                                               |          |     |
| EcTOP3  |     |                                                               |          |     |

**Fig. S1.** Alignment of the type IA topoisomerases. The type IA topoisomerases from different organisms, including *Mus musculus* (Mm), *Homo sapiens* (Hs), *Drosophila melanogaster* (Dm), *Saccharomyces cerevisiae* (Sc), *G. lamblia* (Gl), *Escherichia coli* (Ec), *Thermotoga Maritima* (Tm), and *Leishmania donovani* (Ld), are analyzed by ClustalW 1.83 with all default settings. GenBank *accession* numbers for MmTOP3 $\alpha$ , MmTOP3 $\beta$ , HsTOP3 $\alpha$ , HsTOP3 $\beta$ , DmTOP3 $\alpha$ , DmTOP3 $\beta$ , ScTOP3, LdTOP3 $\beta$ , EcTOP1, EcTOP3, TmTOP1, G17615, and G115190 are [NP\\_033436.1](#), [NP\\_035754.1](#), [NP\\_004609.1](#), [NP\\_003926.1](#), [NP\\_523602.2](#), [NP\\_511059.2](#), [NP\\_013335.1](#), [ACX31684.1](#), [WP\\_097426177.1](#), [WP\\_024221956.1](#), [WP\\_004082962.1](#), [XP\\_001709812.1](#), and [XM\\_001709742.1](#), respectively. Black boxes, gray boxes and hyphens indicate identical amino acids, conserved amino acids and gaps in the respective proteins, respectively. The catalytic important Tyrosine 328 is pointed by a red arrow. The decatenation loop of EcTOP3 (residues 502–519) is indicated by a purple line. The zinc ribbon domains are indicated by red lines. The cysteine residues in the zinc ribbon domains are indicated by red filled circles.

Figure S2

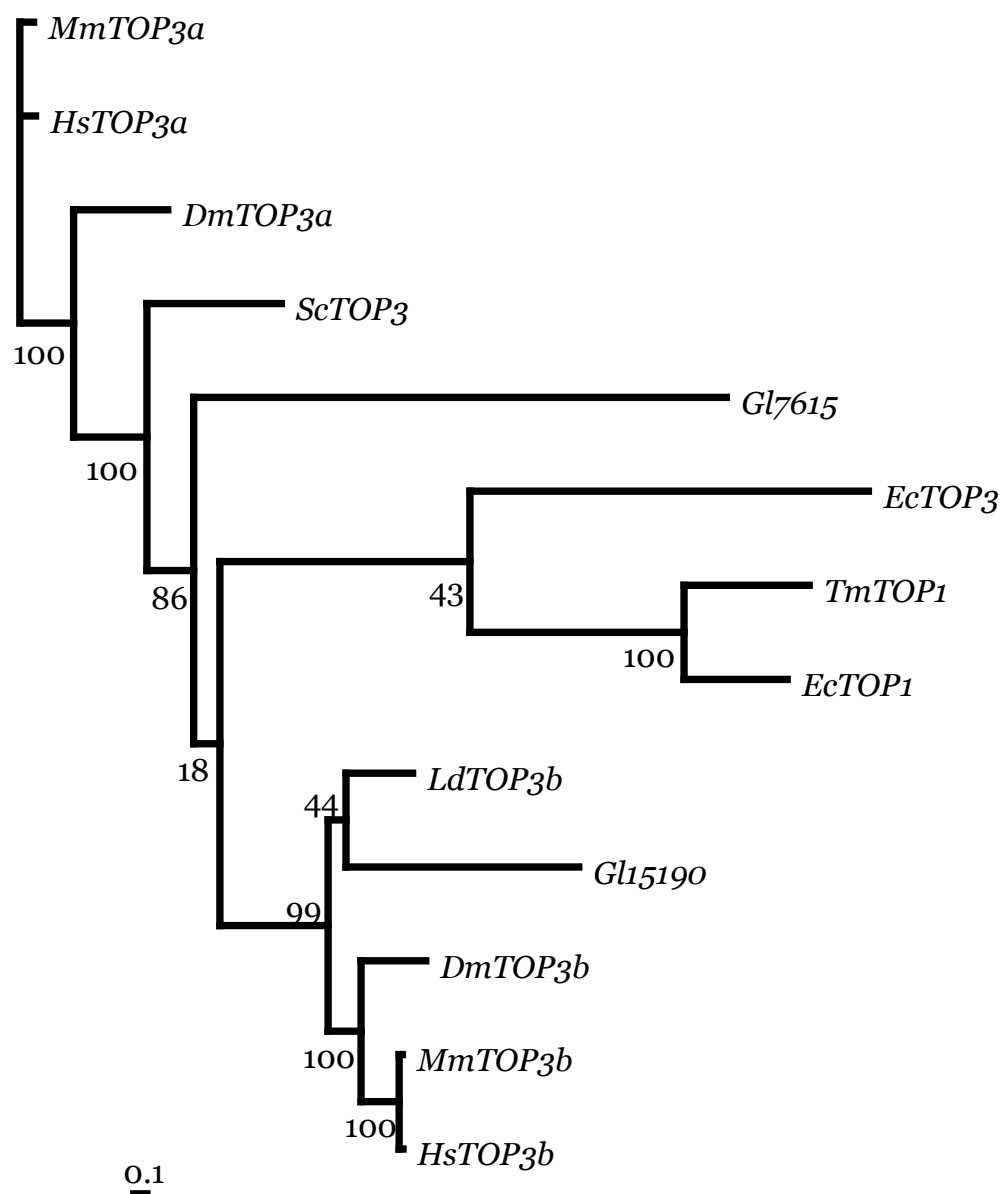

Fig. S2. Phylogenetic analysis of the type IA topoisomerases. A neighbor-joining phylogenetic tree was obtained from alignment of type IA topoisomerases from

various organisms as described. The bootstrap values determined from 1000 trees are not shown. Values are higher than 400.

Figure S3

A

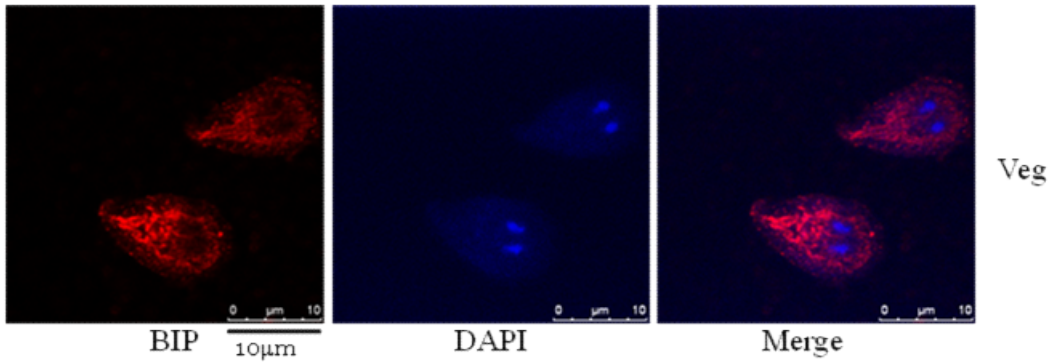

B

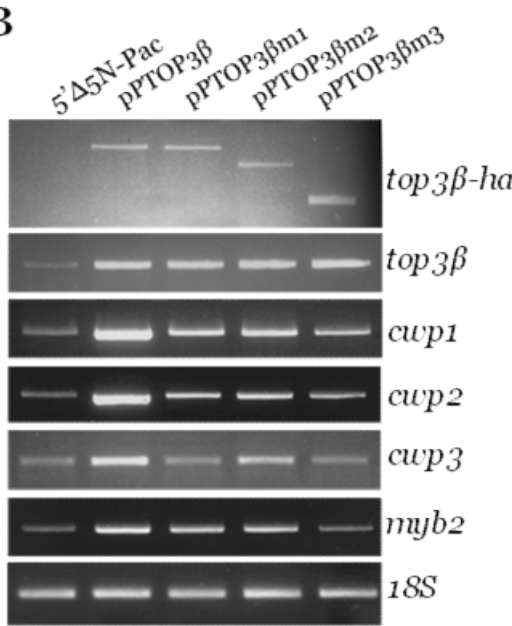

D

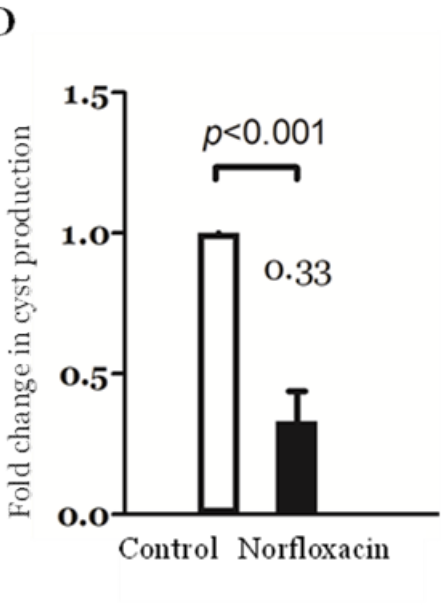

C

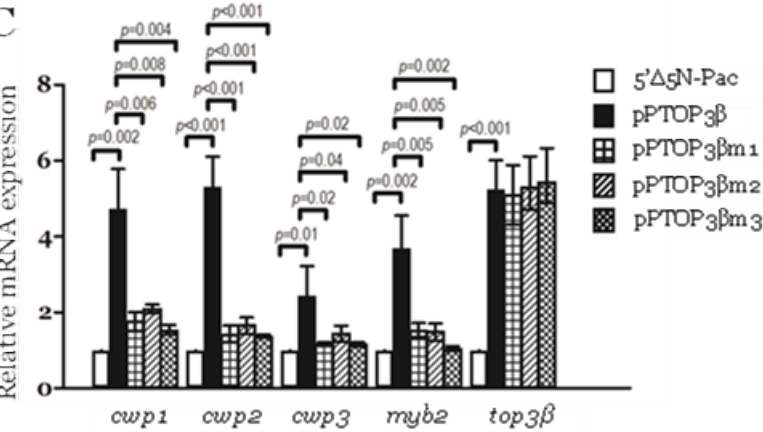

Fig. S3. Induction of *cwp1-3* and *myb2* gene expression in the TOP3 $\beta$ -overexpressing cell line during encystation and inhibition of cyst formation by norfloxacin. (A) ER staining as determined by BIP localization. The wild-type WB trophozoites were cultured in growth medium and then subjected to immunofluorescence assays. The endogenous BIP protein was detected by anti-BIP antibody. The left panel shows that the BIP protein is localized to ER. The middle panel shows that the DAPI staining of cell nuclei. The right panel shows the merged image. The BIP staining did not overlap with DAPI. (B) RT-PCR analysis of gene expression in the TOP3 $\beta$ - and TOP3 $\beta$  mutants-expressing cell lines during encystation. The 5' $\Delta$ 5N-Pac, pPTOP3 $\beta$ , pPTOP3 $\beta$ m1-3 stable transfectants were cultured in encystation medium and then subjected to RT-PCR analysis using primers specific for *top3 $\beta$ -ha*, *top3 $\beta$* , *cwp1*, *cwp2*, *cwp3*, *myb2*, and 18S ribosomal RNA genes, respectively. Representative results are shown. (C) The intensity of bands from three RT-PCR assays was quantified using Image J. The ratio of each target gene over the loading control (18S ribosomal RNA gene) is calculated. Fold change is calculated as the ratio of the difference between the pPTOP3 $\beta$ /m1-3 sample and control sample, to which a value of 1 was assigned. Results are expressed as means  $\pm$  95% confidence intervals (error bars) of at least three separate experiments.  $p < 0.05$  was considered significant and the value was shown. (D) The addition of norfloxacin decreased cyst formation. The wild-type nontransfected WB cells were cultured in growth medium containing 497 $\mu$ M norfloxacin, or the same volume of Me2SO for 24h and then subjected to cyst count as described under “Materials and Methods” and Fig. 3D.



Figure S4

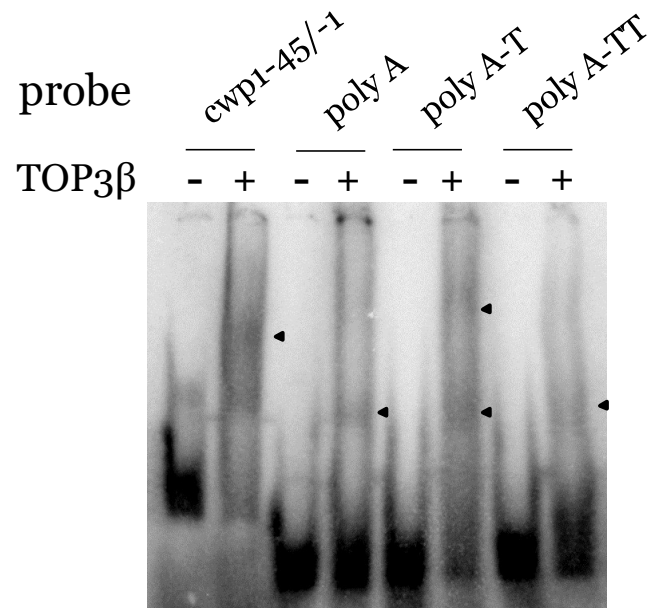

|                          |                                                                     |
|--------------------------|---------------------------------------------------------------------|
| <b><i>cwp1-45/-1</i></b> | GTTTACAAC TCTCAGATCAAGAAACACAGAA <u>ATA<sup>*</sup>AAATAT</u> CAGGG |
| <b>poly A</b>            | AAAAAAAAAAAAAAAAAAAAAAAAAAAA                                        |
| <b>poly A-T</b>          | AAAAAAAAAAATAAAAAAAAAAAAA                                           |
| <b>poly A-TT</b>         | AAAAAAAAAAATTAAAAAAAAAAAAA                                          |

Fig. S4. TOP3β may bind to AT-rich sequence. Electrophoretic mobility shift assays were performed using purified TOP3β and various <sup>32</sup>P-end-labeled oligonucleotide probes *cwp1-45/-1*, poly A, poly A-T, and poly A-TT as described. Components in the binding reaction mixtures are indicated above the lanes. The arrowhead indicates the shifted complex.

Figure S5

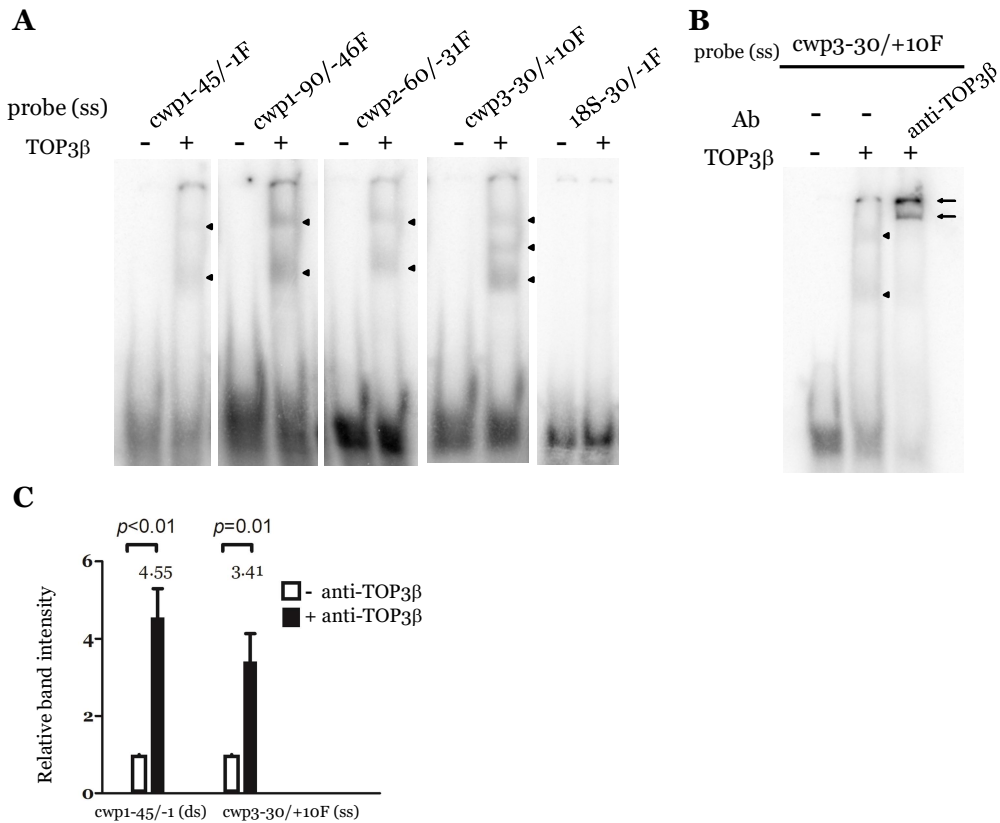

Fig. S5. Single-stranded DNA-binding and cleavage ability of TOP3 $\beta$ . (A)

Single-stranded DNA-binding ability of TOP3 $\beta$ . Electrophoretic mobility shift assays were performed using purified TOP3 $\beta$  and  $^{32}$ P labeled single-stranded (ss) oligonucleotide probes, such as cwp1-45/-1F (the forward single strand of the cwp1-45/-1). Components in the binding reaction mixtures are indicated above the lanes. The arrowheads indicate the shifted complexes. (B) The single-stranded DNA-binding activity of TOP3 $\beta$  was validated by supershift assays. Some reaction

mixtures contained 0.8 $\mu$ g of anti-TOP3 $\beta$  antibody as indicated above the lanes. (C) Quantitation of the intensity of anti-TOP3 $\beta$  supershift bands as indicated by arrows in Fig. 5C and Fig. S5B. The intensity of bands from three assays with double-stranded (ds) cwp1-45/-1 probe and single-stranded (ss) cwp3-40/+10F probe was quantified using Image J. Fold change is calculated as the ratio of the difference between the + anti-TOP3 $\beta$  sample and - anti-TOP3 $\beta$  sample, to which a value of 1 was assigned. Results are expressed as means  $\pm$  95% confidence intervals (error bars) of at least three separate experiments.  $p < 0.05$  was considered significant and the value was shown.

Figure S6

ATGGGCACCGAGTACAAGCCCACGGTGCGCCTCGCCACCCGCGACGACGTCCCCGGGCCG  
TACGCACCCTCGCCGCCGCGTTTCGCCGACTACCCCGCCACGCGCCACACCGTCGACCCGGA  
CCGCCACATCGAGCGGGTCACCGAGCTGCAAGAACTCTTCCTCACGCGCGTCGGGCTCGAC  
ATCGGCAAGGTGTGGGTTCGCGGACGACGGCGCCGCGGTGGCGGTCTGGACCACGCCGGAGA  
GCGTCGAAGCGGGGGCGGTGTTTCGCCGAGATCGGCCCGCGCATGGCCGAGTTGAGCGGTTC  
CCGGCTGGCCGCGCAGCAACAGATGGAAGGCCTCCTGGCGCCGCACCGGCCCAAGGAGCCC  
GCGTGGTTCTGGCCACCGTCGGCGTCTCGCCCGACCACCAGGGCAAGGGTCTGGGCAGCG  
CCGTCGTGCTCCCCGGAGTGGAGGCGGCCGAGCGCGCCGGGGTGGCCGCCTTCCTGGAGAC  
CTCCGCGCCCCGCAACCTCCCCTTCTACGAGCGGCTCGGCTTCACCGTCACCGCCGACGTC  
GAGTGCCCCG**AAGGACCGCGCGACCTGG**TGCATGACCCGCAAGCCCGGTGCCCTCGAGTGAc  
catcaagtgccttgctattatgtaaactacttcctactccattaaatatttagacgcgcagt  
tctggctatgggaccgaaacttttgaagagcgagtcagctatgagtttatggatgaaaacg  
cagttcaatcagatcgtgcggtatataagtataagatacataaccgtagagtgctaatac  
gaccacccgagtagttgataattcatcaatcactggcagggcaaatacactcaccagaacca  
gctagttcaattttgtgcttcggacttttagatctgctgatctagactttattccactaacgg  
atacttttagatcagttgttcaccacttggtggtactctctgtgacgtcaccttgtgcgtg  
atgcagtgccccagttccgcctgttgctgctgccaatggaggcccgccataacgttctacg  
cagtcctttctgatcagccttgcgctccaactggcgacagaggagtgcacaaccgtctctgg  
tgatcagcccgacacttgcaaggcctgtagcgccgtcatcaacggcaagaagtactgctcc  
cagtgcaacggcggtgggtctcaatctgccccaacggacggagtggtgctcagcagacaaca  
acgaatgcccctaaaagaacaacggagtatgtacacagtgcgctcatgagtccttcatgta  
caagagcggatgctacaaggatagccaggcacctggcaacacgatgtgtgaaacagcaact  
gatggagtggtgcacactaactaaggctggatacttcgtgccgcccgggcgcagacgcctctc  
accagt**cggtcataccatgtggagacg**

Fig. S6. Replacement of the *top3 $\beta$*  gene with the *pac* gene in the TOP3 $\beta$ td cell line confirmed by PCR and sequencing. Genomic DNA was isolated from the TOP3 $\beta$ td and control cell lines cultured in growth medium. PCR was performed using primers specific for *pac* (PCR2 in Fig. 8A), which are PCR2F for bold region 1 and PCR2R for bold region 2, to verify the integration of the *pac* gene into the correct region in genomic DNA. The sequence results obtained from the PCR2 product are shown as underlined letters. Capital letters indicate the coding sequence for the *pac* gene, which

starts at ATG and stops at TGA. This indicates the replacement of the *top3β* gene with the *pac* gene. The region used to clone the *top3β* 3' region into the pTOP3βtd plasmid for HR is shown in red, which is also between the sequence of top3β3XF and top3β3KR. The underlined and lower case letters, which are downstream and outside of the red region of top3β3XF and top3β3KR, indicate that HR occurred in the sequence of *top3β* 3' region and that the *pac* gene was integrated in the genomic DNA.

## Figure S7

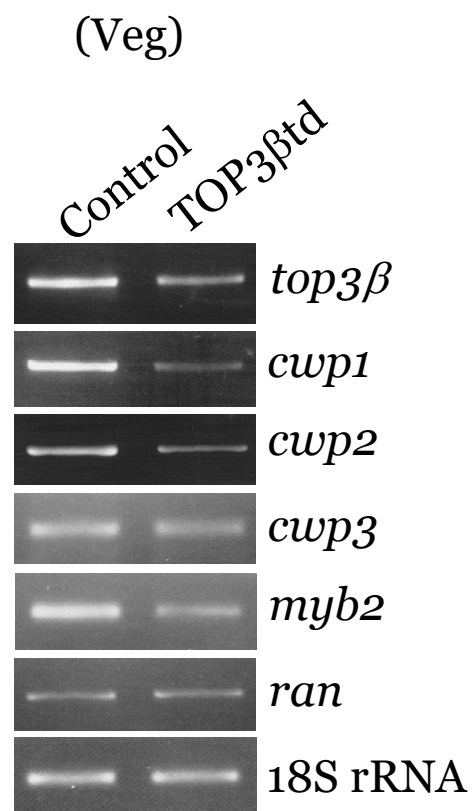

Fig. S7. RT-PCR analysis of gene expression in the TOP3 $\beta$ td cell line. The control and TOP3 $\beta$ td cell lines were cultured in growth medium and then subjected to RT-PCR analysis using primers specific for *top3 $\beta$* , *cwp1*, *cwp2*, *cwp3*, *myb2*, *ran*, and 18S ribosomal RNA genes, respectively. The *ran* mRNA levels did not significantly change.

Figure S8

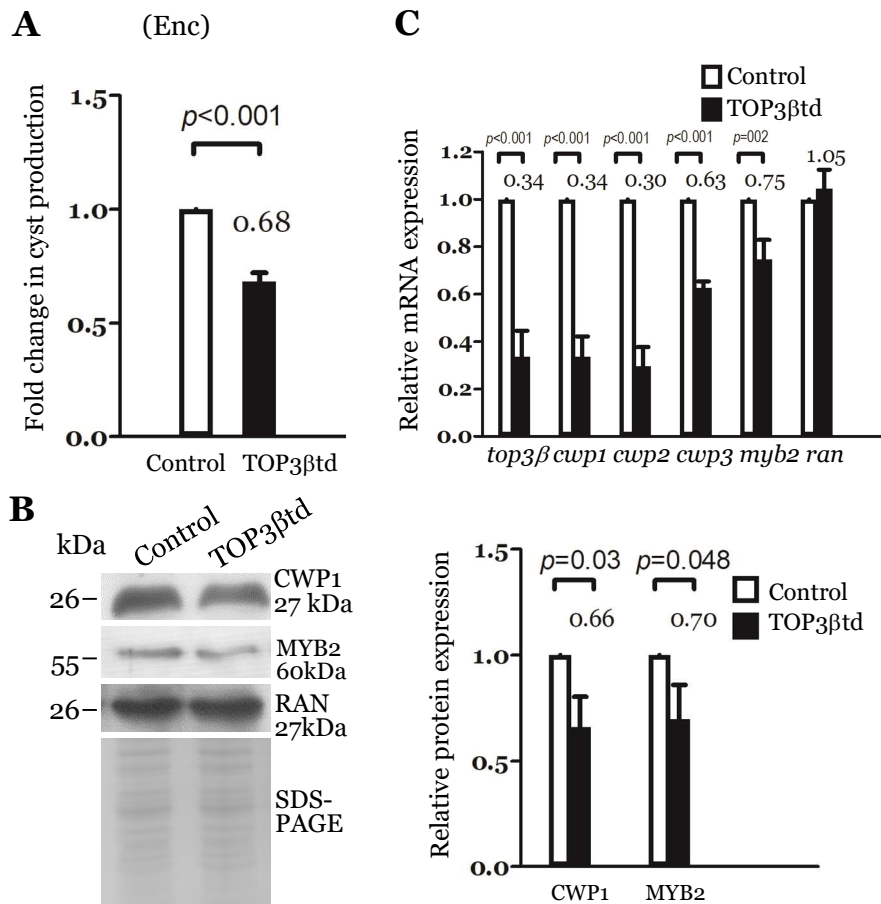

**Fig. S8.** Decrease in expression of *cwp1-3* and *myb2* by targeted disruption of the *top3β* gene during encystation. (A) Cyst formation decreased by targeted disruption of the *top3β* gene in the TOP3βtd cell line during encystation. The control and TOP3βtd cell lines were cultured in encystation medium for 24h (Enc) and then subjected to cyst count as described under “Materials and Methods” and Fig. 3D. (B) Targeted disruption of the *top3β* gene decreased the CWP1 and MYB2 levels in the TOP3βtd

cell line during encystation. The control and TOP3 $\beta$ td cell lines were cultured in encystation medium for 24h and then subjected to SDS-PAGE and Western blot analysis as described in Fig. 3A. The blot was probed with anti-CWP1, anti-MYB2, and anti-RAN antibodies, respectively. The intensity of bands from three Western blot assays was quantified as described in Fig. 3A. (C) Decrease in expression of *cwp1-3* and *myb2* by targeted disruption of the *top3 $\beta$*  gene in the TOP3 $\beta$ td cell line during encystation. The control and TOP3 $\beta$ td cell lines were cultured in encystation medium for 24h and then subjected to quantitative real-time RT-PCR analysis using primers specific for *top3 $\beta$* , *cwp1*, *cwp2*, *cwp3*, *myb2*, *ran*, and 18S ribosomal RNA genes, respectively, as described in Fig. 1B.



Figure S9

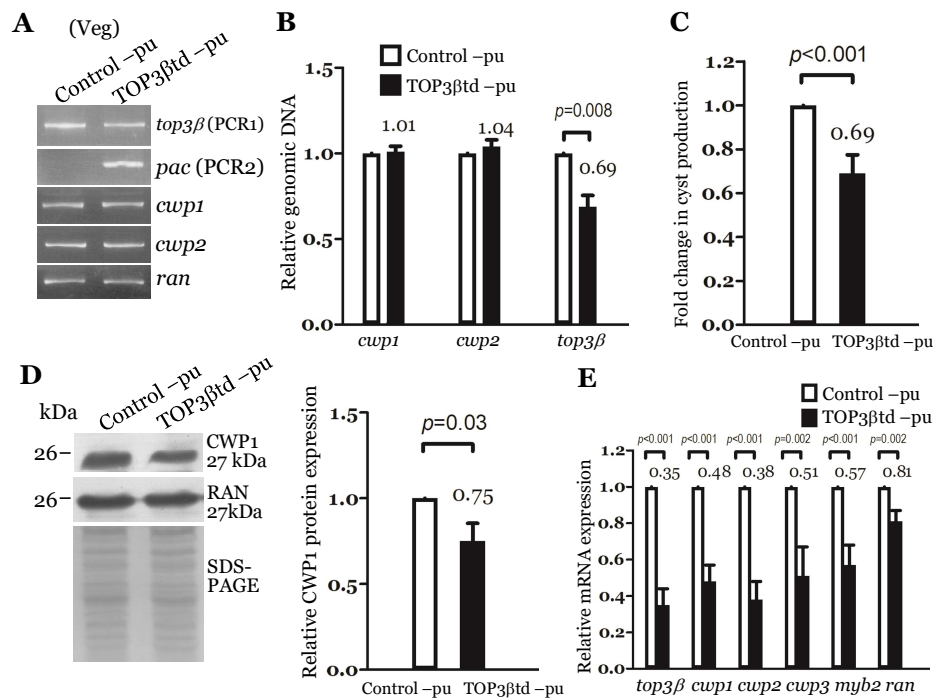

**Fig. S9.** Decrease in expression of *cwp1-3* and *myb2* by targeted disruption of the *top3β* gene after the removal of puromycin during vegetative growth. (A) Partial replacement of the *top3β* gene with the *pac* gene in the TOP3β -pu cell line confirmed by PCR. Puromycin was removed from the TOP3βtd and control cell lines to obtain the TOP3βtd -pu and control -pu cell lines, respectively. Genomic DNA was isolated from the TOP3βtd -pu and control -pu cell lines cultured in growth medium (vegetative growth, Veg). PCR was performed using primers specific for *top3β* (PCR1), *pac* (PCR2), *cwp1*, *cwp2*, and *ran* genes, respectively, as described in Fig. 8B. (B) Partial disruption of the *top3β* gene in the TOP3βtd -pu cell line confirmed by real-time PCR. Real-time PCR was performed using genomic DNA and primers specific for *top3β*, *cwp1*, *cwp2*, and *ran* genes, respectively, as described in

Fig. 8C. (C) Cyst formation decreased by targeted disruption of the *top3 $\beta$*  gene in the TOP3 $\beta$ td –pu cell line during vegetative growth. The control –pu and TOP3 $\beta$ td –pu cell lines were cultured in growth medium and then subjected to cyst count as described under “Materials and Methods” and Fig. 3D. (D) Targeted disruption of the *top3 $\beta$*  gene decreased the CWP1 and MYB2 levels in the TOP3 $\beta$ td –pu cell line during vegetative growth. The control –pu and TOP3 $\beta$ td –pu cell lines were cultured in growth medium and then subjected to SDS-PAGE and Western blot analysis as described in Fig. 3A. The blot was probed with anti-CWP1, anti-MYB2, and anti-RAN antibodies, respectively. The intensity of bands from three Western blot assays was quantified as described in Fig. 3A. (E) Decrease in expression of *cwp1-3* and *myb2* by targeted disruption of the *top3 $\beta$*  gene in the TOP3 $\beta$ td –pu cell line during vegetative growth. The control –pu and TOP3 $\beta$ td –pu cell lines were cultured in growth medium and then subjected to quantitative real-time RT-PCR analysis using primers specific for *top3 $\beta$* , *cwp1*, *cwp2*, *cwp3*, *myb2*, *ran*, and 18S ribosomal RNA genes, respectively, as described in Fig. 1B.

Figure S10

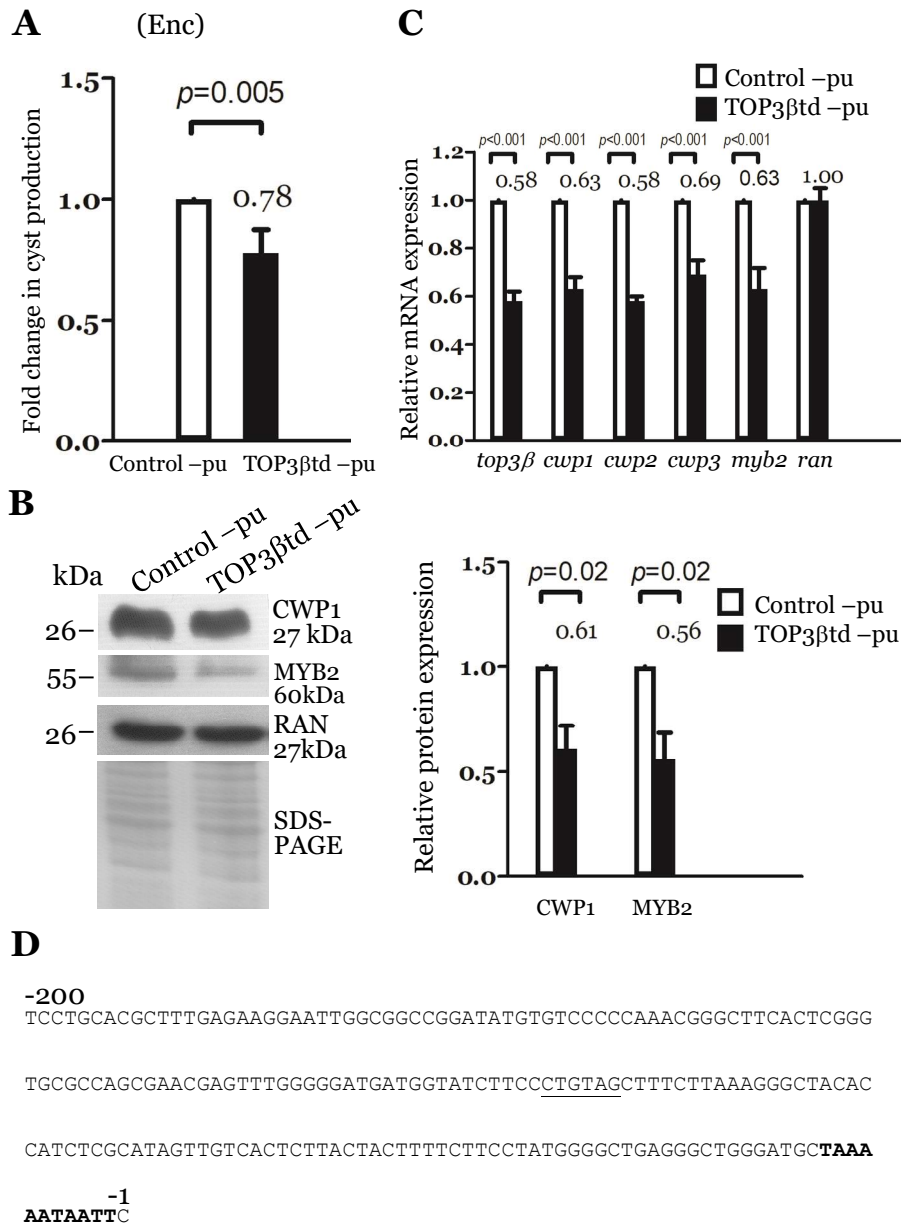

**Fig. S10.** Decrease in expression of *cwp1-3* and *myb2* by targeted disruption of the *top3β* gene after the removal of puromycin during encystation. (A) Cyst formation decreased by targeted disruption of the *top3β* gene in the TOP3βtd -pu cell line during encystation. The control -pu and TOP3βtd -pu cell lines were cultured in

encystation medium for 24h (Enc) and then subjected to cyst count as described under “Materials and Methods”, as described in Fig. 3D. (B) Targeted disruption of the *top3 $\beta$*  gene decreased the CWP1 and MYB2 levels in the TOP3 $\beta$ td –pu cell line during encystation. The control –pu and TOP3 $\beta$ td –pu cell lines were cultured in encystation medium and then subjected to SDS-PAGE and Western blot analysis as described in Fig. 3A. The blot was probed with anti-CWP1, anti-MYB2, and anti-RAN antibodies, respectively. The intensity of bands from three Western blot assays was quantified as described in Fig. 3A. (C) Decrease in expression of *cwp1-3* and *myb2* by targeted disruption of the *top3 $\beta$*  gene in the TOP3 $\beta$ td –pu cell line during encystation. The control –pu and TOP3 $\beta$ td –pu cell lines were cultured in encystation medium and then subjected to quantitative real-time RT-PCR analysis using primers specific for *top3 $\beta$* , *cwp1*, *cwp2*, *cwp3*, *myb2*, *ran*, and 18S ribosomal RNA genes, respectively, as described in Fig. 1B. (D) The MYB2 binding site in the *top3 $\beta$*  promoter. The 200-bp 5' untranslated region of the *top3 $\beta$*  promoter is shown. The AT-rich promoter element is in bold. The underlined sequence, CTGTAG, is the reverse sequence of the MYB2 binding sequence, CTACAG.
